# Supplementary material for: Reduced production of laminin by hepatic stellate cells contributes to impairment in oval cell response to liver injury in aged mice
Source: publisher site journal article supplement (doi:10.18632/aging.101665), 2018-12-04
Supplement: Supplementary file [file aging-v10i12-101665-supplementary-material-SD3.pdf]

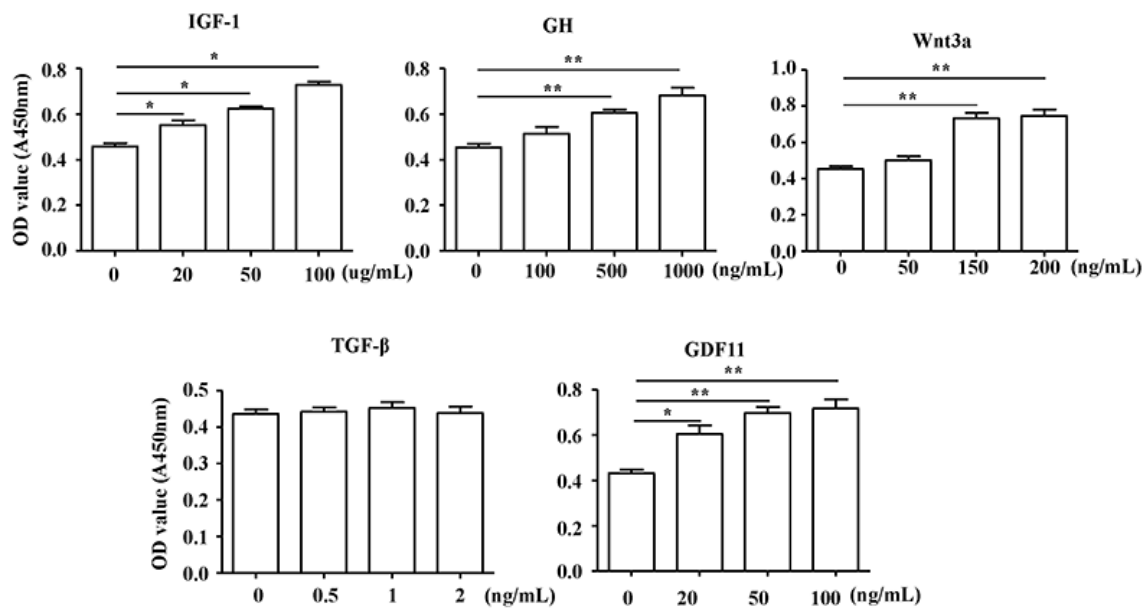

**Supplementary Figure S3. The proliferation of OCs under the treatment of several cytokines.** OCs were treated with IGF-1 (0, 20, 50, 100 ug/ml), GH (0, 100, 500, 1000 ng/ml), Wnt3a (0, 50, 150, 200 ng/ml), TGF-β (0, 0.5, 1, 2 ng/ml) and GDF11 (0, 20, 50, 100 ng/ml) for 24 hours, and the CCK-8 test was performed (n=5, \* p < 0.05, \*\* p < 0.01).
