# Supplementary material for: Reduced production of laminin by hepatic stellate cells contributes to impairment in oval cell response to liver injury in aged mice
Source: publisher site journal article supplement (doi:10.18632/aging.101665), 2018-12-04
Supplement: Supplementary file [file aging-v10i12-101665-supplementary-material-SD4.pdf]

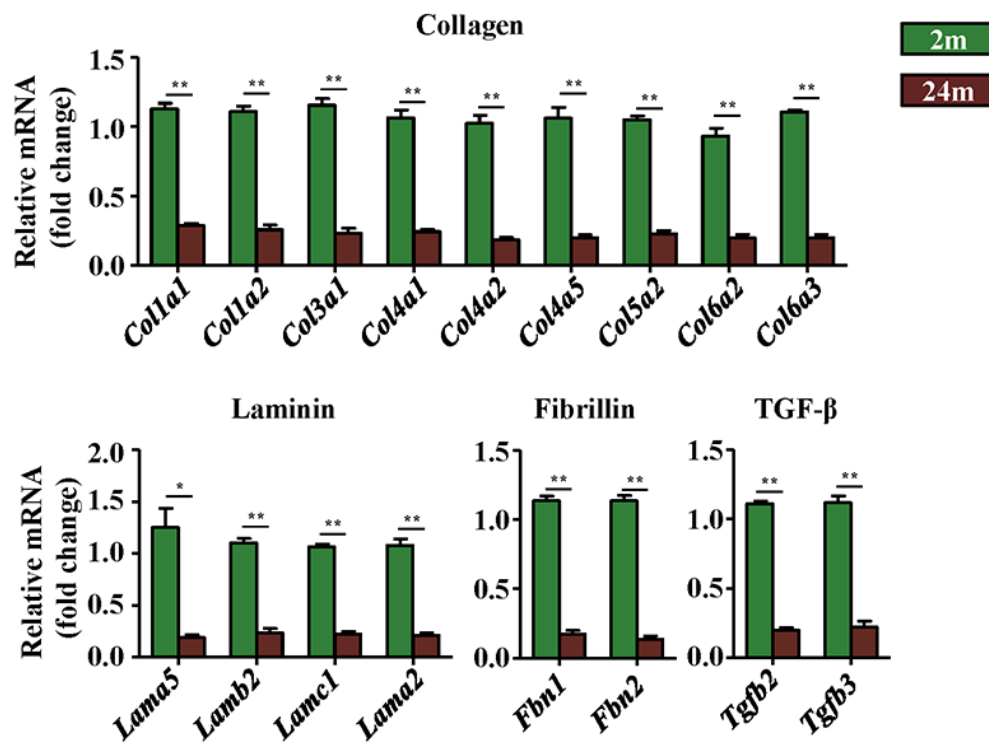

**Supplementary Figure S4. The expression levels of ECM-related genes in the liver tissues of young and aged DDC mice.** The expression levels of collagen isoform genes (*Col1a1*, *Col1a2*, *Col3a1*, *Col4a1*, *Col4a2*, *Col4a5*, *Col5a2*, *Col6a2* and *Col6a3*), laminin isoform genes (*Lama2*, *Lama5*, *Lamb2* and *Lamc1*), fibrillin isoforms (*Fbn1* and *Fbn2*) and TGF-β isoform genes (*Tgfb2* and *Tgfb3*) were quantified by quantitative Real-time PCR (n=5, \* p< 0.05, \*\* p< 0.01).
